# Supplementary material for: The Physicochemical Compatibility of Sildenafil Injection with Parenteral Medications Used in Neonatal Intensive Care Settings
Source: MDPI journal article supplement (doi:10.3390/pharmaceutics16030419), 2024-03-18
Supplement: s1 [file s1]

## **Supplementary information**

### **Physicochemical compatibility of sildenafil injection with parenteral medications used in neonatal intensive care settings**

**D. Thisuri N. De Silva,<sup>1</sup> Tobias Strunk,<sup>2,3,4</sup> Michael Petrovski,<sup>5</sup> Madhu Page-Sharp,<sup>1</sup>  
Brioni R. Moore,<sup>1,2,3,6</sup> and Kevin T. Batty<sup>1,6\*</sup>**

<sup>1</sup> Curtin Medical School, Curtin University, Bentley, Western Australia

<sup>2</sup> Medical School, The University of Western Australia, Crawley, Western Australia

<sup>3</sup> Wesfarmers Centre for Vaccines and Infectious Diseases, Telethon Kids Institute, Nedlands, Western Australia

<sup>4</sup> Neonatal Directorate, King Edward Memorial Hospital, Child and Adolescent Health Service, Subiaco, Western Australia

<sup>5</sup> Pharmacy Department, King Edward Memorial Hospital, Women and Newborn Health Service, Subiaco, Western Australia

<sup>6</sup> Curtin Health Innovation Research Institute, Curtin University, Bentley, Western Australia

\* Corresponding author: Professor Kevin Batty, Curtin Medical School, Curtin University, GPO Box U1987, Perth, Western Australia, 6845. Telephone: (61-8) 9266 2535; Email: Kevin.Batty@curtin.edu.au

**Section 1:** Manufacturers of the injectable products used for compatibility studies (Table S1) and composition of the 2-in-1 parenteral nutrition solutions (Table S2)

Table S1. Manufacturers/ suppliers of injectable products used for compatibility studies

| <b>Injectable drug</b>     | <b>Manufacturer/ supplier</b>                                        | <b>Lot No</b> |
|----------------------------|----------------------------------------------------------------------|---------------|
| Aciclovir                  | Pfizer Australia Pty Ltd, Sydney, NSW, Australia                     | FT1848AA      |
| Alprostadil                | Pfizer Australia Pty Ltd, Sydney, NSW, Australia                     | FD6386        |
| Amoxicillin                | Juno Pharmaceuticals Pty Ltd, Cremorne, VIC, Australia               | IC02KH        |
| Amphotericin B - Fungizone | Neon Healthcare Ltd, Mill Studio Business Centre, Ware, UK           | 28631TB21     |
| Amphotericin B - Liposomal | Gilead Sciences Pty Ltd, St Kilda Road, Melbourne, VIC, Australia    | 028780        |
| Ampicillin                 | Juno Pharmaceuticals Pty Ltd, Cremorne, VIC, Australia               | 0P03AY        |
| Benzylpenicillin           | Seqirus (Australia) Pty Ltd, Melbourne, VIC, Australia               | KT4974        |
| Caffeine base*             | Perth Children's Hospital, Nedlands, WA, Australia                   | 6018          |
| Caffeine citrate           | Phebra Pty Ltd, Lane Cove West, NSW, Australia                       | 14806         |
| Calcium gluconate          | Phebra Pty Ltd, Lane Cove West, NSW, Australia                       | 14688         |
| Cefotaxime                 | Pfizer Australia Pty Ltd, Sydney, NSW, Australia                     | G105HA0       |
| Ciprofloxacin              | Aspen Pharmacare Australia Pty Ltd, St Leonards, NSW, Australia      | 10597         |
| Clonidine                  | Medicianz Healthcare Pty Ltd, Melbourne, VIC, Australia              | CLA032        |
| Cloxacillin                | Xion Pharmaceuticals Pty Ltd, Pune, India                            | 101           |
| Dexmedetomidine            | Accord Healthcare Pty Ltd, Melbourne, VIC, Australia                 | M2110403      |
| Dobutamine                 | Pfizer Australia Pty Ltd, Sydney, NSW, Australia                     | FY3034AA      |
| Dopamine                   | Juno Pharmaceuticals Pty Ltd, Cremorne, VIC, Australia               | A21F3R        |
| Epinephrine                | Aspen Pharmacare Australia Pty Ltd, St Leonards, NSW, Australia      | AS116A1       |
| Fentanyl citrate           | Piramal Critical Care Pty Ltd, Chatswood, NSW, Australia             | HC5M          |
| Flucloxacillin             | Juno Pharmaceuticals Pty Ltd, Cremorne, VIC, Australia               | OX18HY        |
| Fluconazole                | Pfizer Australia Pty Ltd, Sydney, NSW, Australia                     | B560704       |
| Furosemide                 | Baxter Health care Pty Ltd, Old Toongabbie, NSW, Australia           | B5E0004A      |
| Gentamicin                 | Pfizer Australia Pty Ltd, Sydney, NSW, Australia                     | B785          |
| Heparin                    | Pfizer Australia Pty Ltd, Sydney, NSW, Australia                     | 159049A       |
| Hydrocortisone             | Pfizer Australia Pty Ltd, Sydney, NSW, Australia                     | ER8089        |
| Ibuprofen                  | Seqirus (Australia) Pty Ltd, Melbourne, VIC, Australia               | 10098R        |
| Ibuprofen lysine           | Prasco Laboratories, Commerce Ct, Mason, United States               | B215329       |
| Indometacin                | Promedica SRL, Via Palermo, Parma, Italy                             | 22906         |
| Insulin (Actrapid®)        | Novo Nordisk Pharmaceuticals Pty Ltd, Baulkham Hills, NSW, Australia | LR79K53       |
| Levetiracetam              | Apotex Pty Ltd, Macquarie Park, NSW, Australia                       | 275447        |
| Linezolid                  | Fresenius Kabi Australia Pty Ltd, Mount Kuring-gai, NSW, Australia   | 15PDE270      |
| Meropenem                  | Sun Pharma ANZ Pty Ltd, Macquarie Park, NSW, Australia               | DFC2162A      |
| Metronidazole              | Juno Pharmaceuticals Pty Ltd, Cremorne, VIC, Australia               | 10221         |
| Midazolam                  | Pharmaco (Australia) Ltd, Gordon, NSW, Australia                     | F0021F01      |
| Milrinone                  | Sanofi-Aventis Australia Pty Ltd, Macquarie Park, NSW, Australia     | J0496         |
| Morphine hydrochloride     | Juno Pharmaceuticals Pty Ltd, Cremorne, VIC, Australia               | A22A18        |
| Morphine sulfate           | Pfizer Australia Pty Ltd, Sydney, NSW, Australia                     | 212004        |
| Norepinephrine             | Juno Pharmaceuticals Pty Ltd, Cremorne, VIC, Australia               | 208599        |
| Paracetamol                | B.Braun Australia Pty Ltd, Bella Vista, NSW, Australia               | 21436451      |

| <b>Injectable drug</b>  | <b>Manufacturer/ supplier</b>                                    | <b>Lot No</b> |
|-------------------------|------------------------------------------------------------------|---------------|
| Phenobarbitone          | Aspen Pharmacare Australia Pty Ltd, St Leonards, NSW, Australia  | 042344        |
| Piperacillin/tazobactam | Sandoz Pty Ltd, Macquarie Park, NSW, Australia                   | LN1377        |
| Rifampicin              | Sanofi-Aventis Australia Pty Ltd, Macquarie Park, NSW, Australia | 0J6511        |
| Sildenafil              | Viatis Australia Pty Ltd, Sydney, NSW, Australia                 | B710506       |
| Sodium bicarbonate      | Phebra Pty Ltd, Lane Cove West, NSW, Australia                   | 14924a        |
| Vancomycin              | Hospira Australia Pty Ltd, Mulgrave, VIC, Australia              | J016913AA     |
| Vecuronium              | Sun Pharma ANZ Pty Ltd, Macquarie Park, NSW, Australia           | HAC2372A      |

\*Caffeine base 10 mg/mL injection comprises caffeine, sodium chloride, hydrochloride acid and Water for Injection; the injection is isotonic and has a pH approximately 4.2 (AUSPMAN/ Perth Children's Hospital)

Table S2. Composition of the 2-in-1 parenteral nutrition solutions, manufactured at King Edward Memorial Hospital

|                                | PN 1      | PN 2      | PN 3 | PN 4     | PN 5     | PN 6     |
|--------------------------------|-----------|-----------|------|----------|----------|----------|
|                                | Preterm A | Preterm B | Term | Custom 1 | Custom 2 | Custom 3 |
| Amino acids (Primine), g/100mL | 2.98      | 2.98      | 2.3  | 0.5      | 3.5      | 2.3      |
| Glucose, g/100mL               | 4.96      | 7.94      | 12   | 2        | 14       | 8        |
| Sodium, mmol/100mL             | 3.97      | 3.97      | 4    | 4        | 4        | 4        |
| Potassium, mmol/100mL          | 1.99      | 1.99      | 2    | 2        | 2        | 2        |
| Calcium, mmol/100mL            | 1.49      | 1.49      | 0.9  | 1.5      | 1.5      | 1.5      |
| Magnesium, mmol/100mL          | 0.25      | 0.25      | 0.25 | 0.25     | 0.25     | 0.25     |
| Phosphate, mmol/100mL          | 1.49      | 1.49      | 0.9  | 0.5      | 1.5      | 1.5      |
| Chloride, mmol/100mL           | 2         | 2         | 2.54 | 1.8      | 2.08     | 1.97     |
| Acetate, mmol/100mL            | 1.99      | 1.99      | 2.6  | 1.79     | 2.08     | 1.96     |
| Heparin, units/100mL           | 49.63     | 49.63     | 50   | 50       | 50       | 50       |
| Trace elements, mL/100mL       | 0.73      | 0.73      | 0.74 | 0.74     | 0.74     | 0.74     |

**Section 2.** Method validation - chromatograms of sildenafil degradation experiments (Figure S1 – 5), sildenafil linearity curve (Figure S6), accuracy, precision (Table S3) and robustness testing results of HPLC method (Table S4)

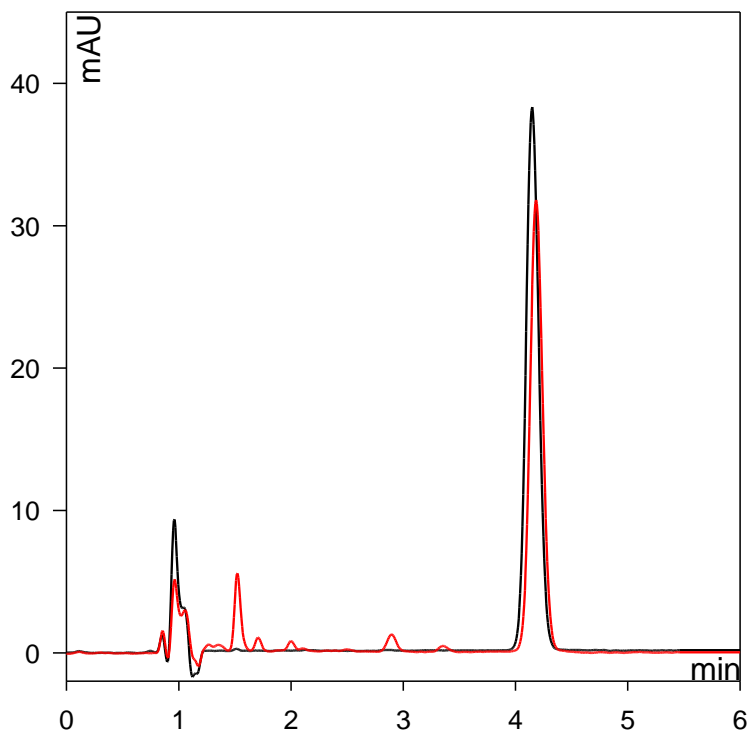

Figure S1 – Sildenafil 600 mcg/mL exposure to 20% v/v hydrogen peroxide (1:1 v/v), stored at 45°C; Sample diluted 1-in-50 with water at the point of assay; injection volume 20  $\mu$ L. (– t0; – Day 7); Degradation products were detected at 1.5, 1.7 and 2.9 min, at day 7

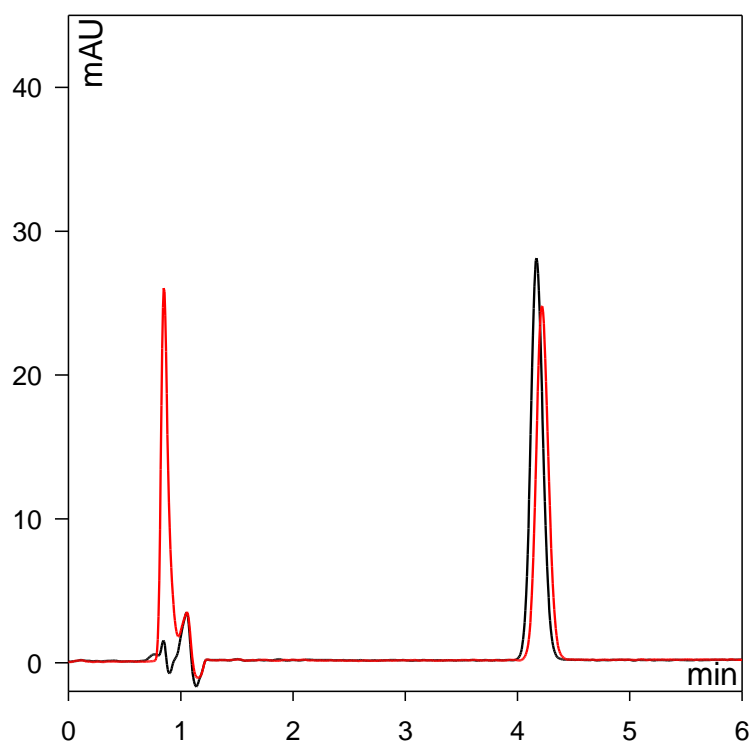

Figure S2 – Sildenafil 600 mcg/mL exposure to 4 M NaOH (1:1 v/v), stored at 45°C; Sample neutralized with 4 M HCl and diluted 1-in-50 with water at the point of assay; Injection volume 20  $\mu$ L. (– t0; – Day 7); A degradation product was detected 0.9 min, at day 7

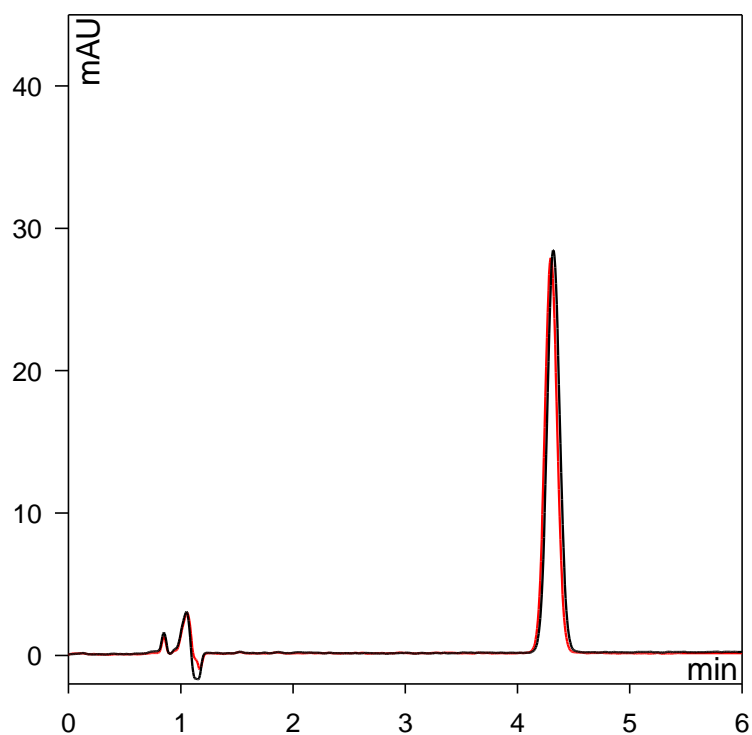

Figure S3 – Sildenafil 600 mcg/mL exposure to 4 M HCl (1:1 v/v), stored at 45°C; Sample neutralized with 4 M NaOH and diluted 1-in-50 with water at the point of assay; Injection volume 20  $\mu$ L. (– t0; – Day 7); No degradation products observed

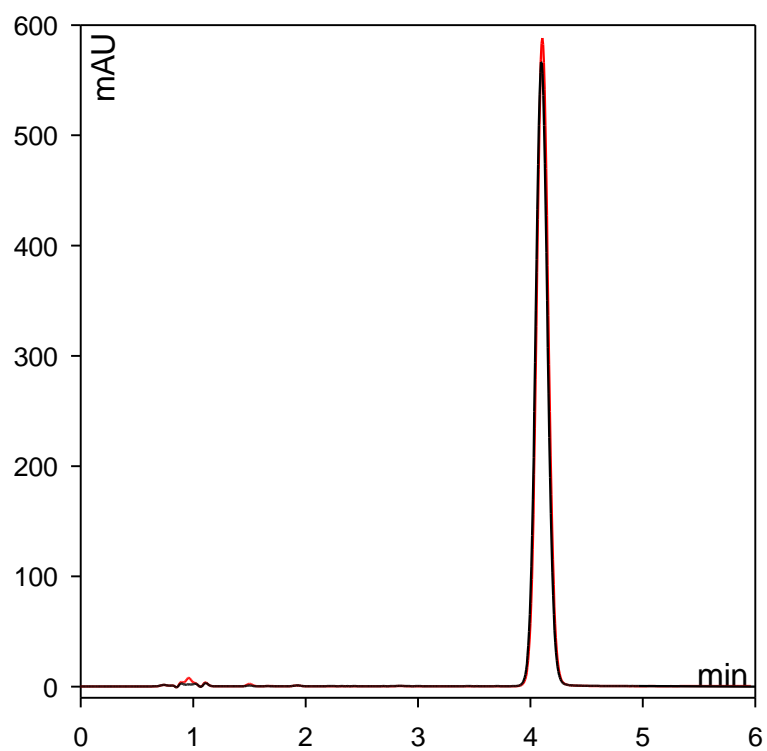

Figure S4 – Sildenafil 600 mcg/mL in water (1:1 v/v) exposure to heat at a temperature of 60°C in a water bath; Injection volume 5  $\mu$ L (– t<sub>0</sub>; – Day 3); No degradation products observed

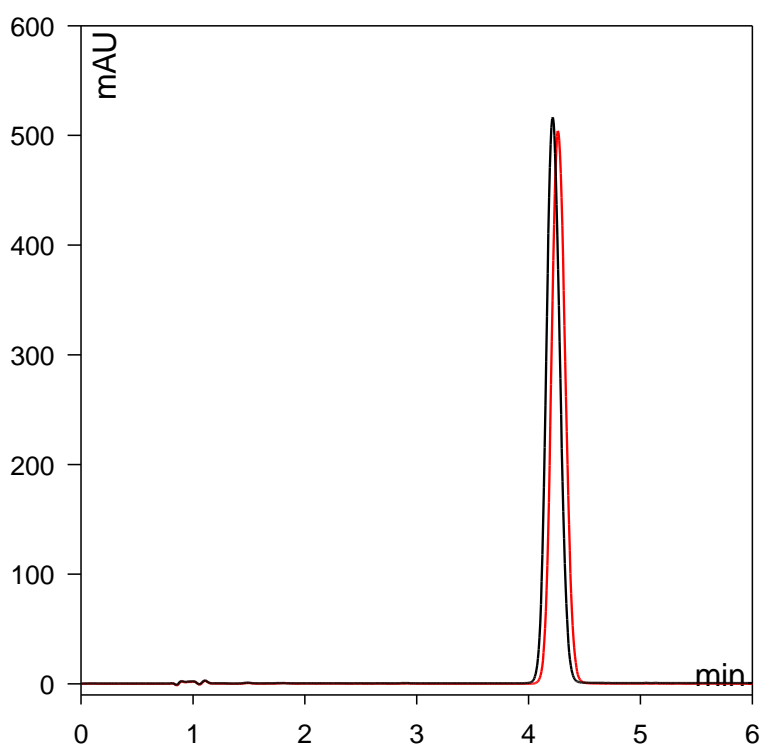

Figure S5 – Sildenafil 600 mcg/mL in water (1:1 v/v) exposure to laboratory fluorescent lighting 24/7 and normal daylight (indirect sunlight) for approximately 12 h per day at 22°C (room temperature); Injection volume 5  $\mu$ L; (– t0; – Day 7); No degradation products observed

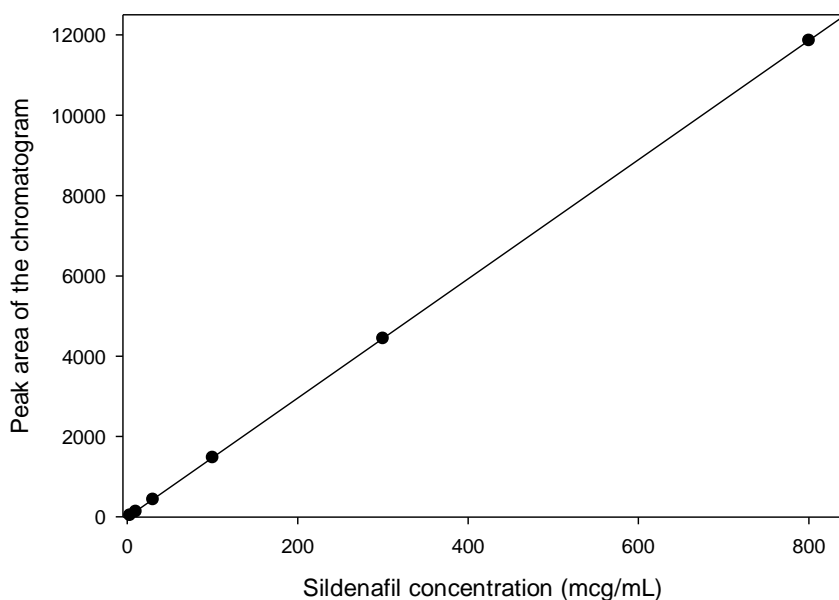

Figure S6 - Linearity curve for sildenafil solution in aqueous solution within the concentration range 3 – 800 mcg/mL (n = 3); Correlation coefficient ( $r^2$ ) >0.999; Regression equation  $Y = 14.86x - 10.036$



### Accuracy and precision of the developed HPLC method

For accuracy testing, separate sildenafil solution series was prepared with concentrations of 600, 100, 10 and 2.9 (LLOQ) mcg/mL (n = 5) using the sildenafil reference standard and the commercial sildenafil injection diluted with D5W. The chromatogram peak areas of the two series were compared, and accuracy was expressed as a percentage of the reference standard solution's peak area (nominal concentration), for the particular concentration level (Table S3).

Intra-assay precision was calculated using the percentage standard deviation (%RSD) of the peak areas of the five replicates of each concentration level of sildenafil injection solutions, in a single assay (Table S3).

Inter-assay precision was determined by calculating the %RSD pooled, for the same sildenafil concentration levels of sildenafil injection solutions, in three assays analysed on different days (Table S3).

Table S3: Accuracy, intra-assay and inter-assay precision data for selected sildenafil concentrations

| Sildenafil concentration (mcg/mL); n = 5 | Sildenafil concentration as a % of nominal concentration (Mean $\pm$ SD, n=5) | Intra assay-precision (% RSD) | Inter-assay precision (% RSD pooled) |
|------------------------------------------|-------------------------------------------------------------------------------|-------------------------------|--------------------------------------|
| LLOQ                                     | 100.2 $\pm$ 2.5                                                               | 2.2                           | 4.2                                  |
| 10                                       | 104.0 $\pm$ 0.8                                                               | 3.1                           | 2.0                                  |
| 100                                      | 104.6 $\pm$ 0.5                                                               | 0.7                           | 0.6                                  |
| 600                                      | 104.0 $\pm$ 0.4                                                               | 0.3                           | 0.3                                  |

### Robustness of the developed HPLC method

The robustness of an analytical procedure is a measure of its capacity to remain unaffected by small, but deliberate variations in method parameters and provides an indication of its reliability during normal usage. To evaluate robustness, sildenafil 100 mcg/mL samples (from sildenafil standard and commercial injection; n = 5) were tested using the modified method. Changes with respect to standard method parameters included flow rate (0.8 mL/min) and mobile phase composition (Acetonitrile: Buffer ratio 45:55). The accuracy of the modified methods was compared with the standard method. The percentage concentrations of sildenafil in robustness testing experiment revealed that the method was robust despite deliberate minute changes in method parameters (Table S4).

Table S4: Robustness test results for deliberate changes in method parameters

| Parameters                                         | Conditions | Sildenafil concentration as a % of nominal concentration (Mean $\pm$ SD, n=5) |
|----------------------------------------------------|------------|-------------------------------------------------------------------------------|
| Flow rate                                          | 1 mL/min   | 105.1 $\pm$ 1.0                                                               |
|                                                    | 0.8 mL/min | 105.1 $\pm$ 1.1                                                               |
| Mobile phase composition<br>(Acetonitrile: Buffer) | 40:60      | 105.1 $\pm$ 1.0                                                               |
|                                                    | 45:55      | 105.2 $\pm$ 1.0                                                               |

### System suitability

A potential limitation of the study is the exclusion of peak purity analysis. However, to confirm system suitability, a sildenafil reference standard solution of 300 mcg/mL (the nominal sildenafil concentration of sildenafil and secondary drug combination samples) was analysed using the HPLC method alongside the compatibility samples in each assay. The %RSD of the retention time, peak area and the peak symmetry of sildenafil peak were 1.6, 2.0 and 2.3 respectively. The peak symmetry for sildenafil remained between 0.9 – 1.04, throughout the experimenting period.

**Section 3.** Sildenafil filter testing data – Syringe filter types tested (Table S5), Sildenafil percentage recovery by different filters – pilot study (Figure S7 – 8)

Table S5: Syringe filter types tested, the membrane and mesh size description

| Abbreviation | Description                                                           | Manufacturer/ Supplier                                                         |
|--------------|-----------------------------------------------------------------------|--------------------------------------------------------------------------------|
| RC           | Regenerated Cellulose, 15 mm diameter, 0.2 µm membrane, non-sterile   | Phenomenex Australia Pty Ltd, 2 Chaplin Dr, Lane Cove West NSW 2066            |
| NY           | Nylon, 15 mm diameter, 0.2 µm membrane, non-sterile                   | Phenomenex Australia Pty Ltd, 2 Chaplin Dr, Lane Cove West NSW 2066            |
| PVDF         | Polyvinylidene Fluoride, 15 mm diameter, 0.2 µm membrane, non-sterile | Phenomenex Australia Pty Ltd, 2 Chaplin Dr, Lane Cove West NSW 2066            |
| PES          | Millex-GP, Polyethersulfone, 33 mm, 0.22 µm membrane, sterile         | Merck Millipore Ltd., Tullagreen, Carrigtwohill, County Cork, Ireland          |
| MCE          | Millex-GS, Mixed cellulose esters, 33 mm, 0.22 µm membrane, sterile   | Merck Millipore Ltd., Tullagreen, Carrigtwohill, County Cork, Ireland          |
| GHP          | Hydrophilic polypropylene 13 mm, 0.2 µm membrane, non-sterile         | Pall Life Sciences 1 - 2 Wandarri Court, Cheltenham 3192, Melbourne, Australia |
| Inline       | Polyethersulfone, 0.2 µm membrane, sterile                            | Pall Medical, Avenue de Tivoli 3, CH-1700 Fribourg, Switzerland                |
| Inline lipid | Lipid filter, 1.2 µm membrane, sterile                                | Codan US Corporation, USA                                                      |

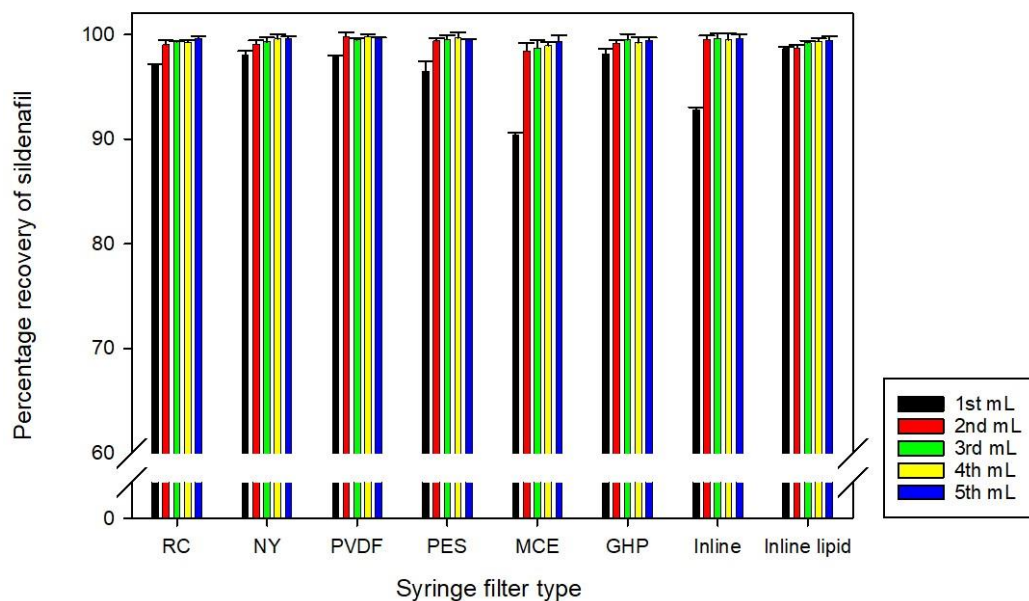

Figure S7- Sildenafil percentage recovery by different filters using the 600 mcg/mL solution; The coloured bars represent the recovery in five separate, consecutive millilitre portions – pilot study

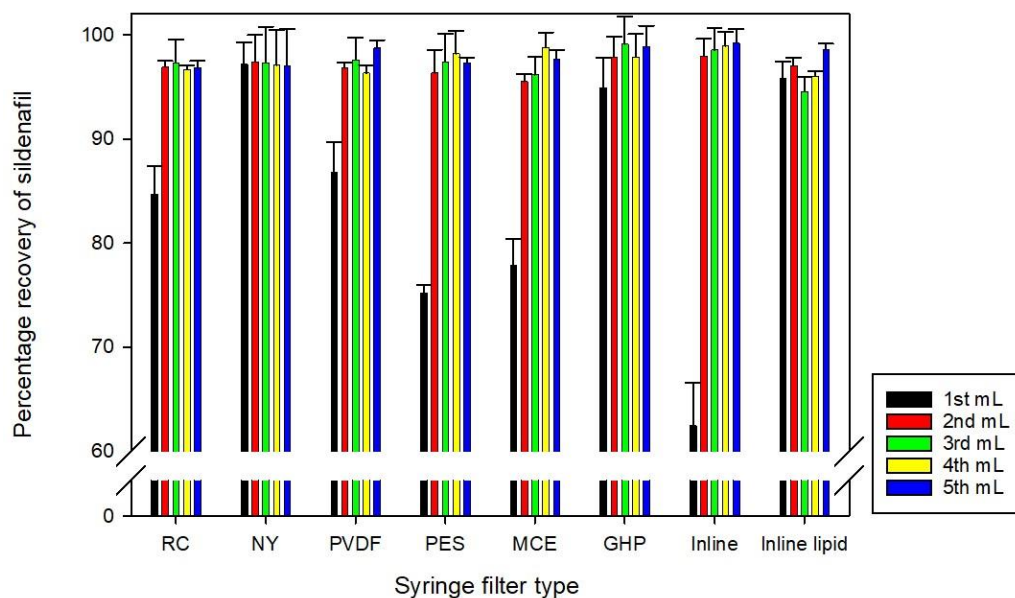

Figure S8 - Sildenafil percentage recovery by different filters using the 60 mcg/mL solution; The coloured bars represent the recovery in five separate, consecutive millilitre portions – pilot study

**Section 4.** Photographs and corresponding photomicrographs of physical incompatibilities of sildenafil 600 mcg/mL with furosemide, heparin, rifampicin, and calcium gluconate (Figure S9 – 12)

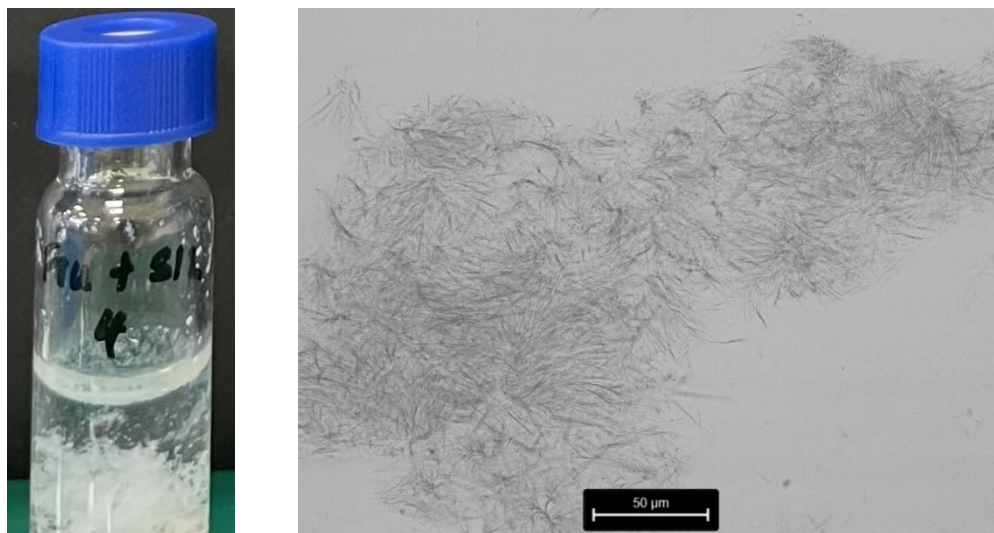

Figure S9 - Photograph (left) and corresponding photomicrograph (right) (Leica MC190HD, objective x40) of physical incompatibility (white precipitate) of sildenafil 600 mcg/mL with furosemide 1 mg/mL

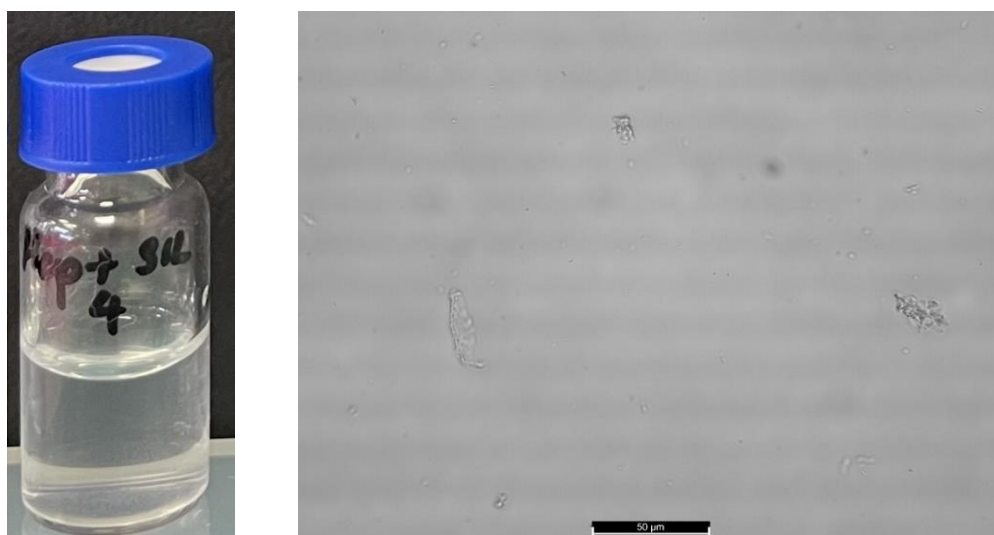

Figure S10 - Photograph (left) and corresponding photomicrograph (right) (Leica MC190HD, objective x40) of physical incompatibility (haze) of sildenafil 600 mcg/mL with heparin 100 units/mL

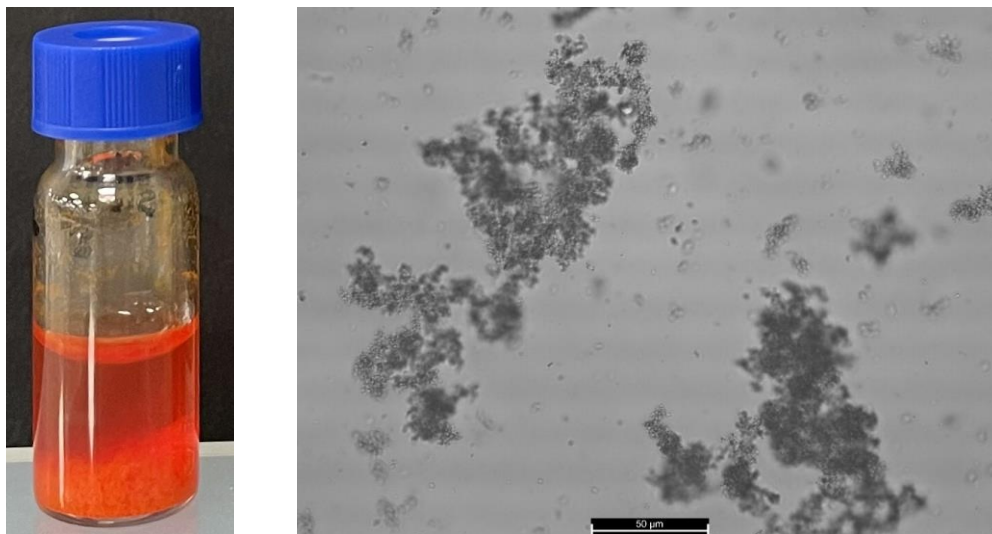

Figure S11 - Photograph (left) and corresponding photomicrograph (right) (Leica MC190HD, objective x40) of physical incompatibility (precipitate in an originally coloured solution) of sildenafil 600 mcg/mL with rifampicin 6 mg/mL

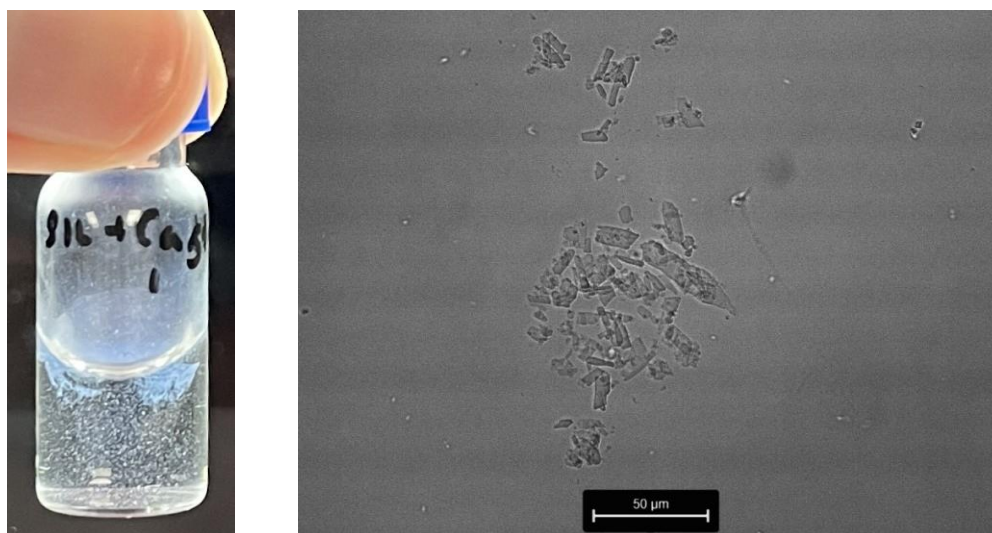

Figure S12 - Photograph (left) and corresponding photomicrograph (right) (Leica MC190HD, objective x40) of physical incompatibility (particles under polarized light) of sildenafil 600 mcg/mL with calcium gluconate 100 mg/mL
